# Supplementary material
Source: PubMed Central journal article supplement (PMC4300299)
Supplement: DS_10.1177_0022034514559129.pdf [file DS_10.1177_0022034514559129.pdf]

# NFIB Regulates Embryonic Development of Submandibular Glands

Journal of Dental Research  
DSI-DS3  
© International & American Associations  
for Dental Research 2014  
Reprints and permissions:  
sagepub.com/journalsPermissions.nav  
DOI: 10.1177/0022034514559129  
jdr.sagepub.com

R.E. Mellas<sup>1</sup>, H. Kim<sup>2</sup>, J. Osinski<sup>3</sup>, S. Sadibasic<sup>2</sup>, R.M. Gronostajski<sup>3</sup>,  
M. Cho<sup>4</sup>, and O.J. Baker<sup>1</sup>

## Appendix

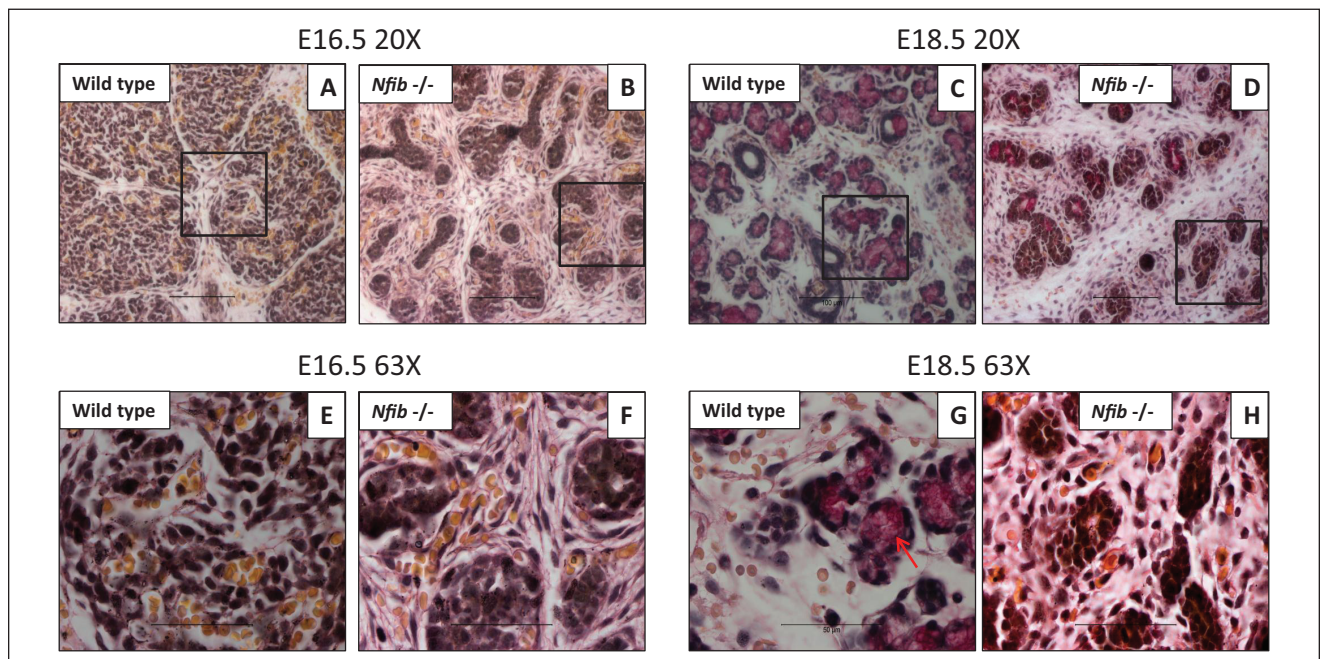

**Appendix Figure 1.** Mucin presence and distribution is altered in *Nfib*<sup>-/-</sup> mice at E16.5 and E18.5. Slides were prepared as described in the Materials and Methods. Slides were stained with a mucicarmine stain (Newcomer Supply, Middleton, WI, USA). The red arrow indicates mucin expression in the cytoplasm.

<sup>1</sup>School of Dentistry University of Utah, Salt Lake City, UT, USA

<sup>2</sup>Department of Restorative Dentistry, School of Dental Medicine, University at Buffalo, The State University of New York, Buffalo, NY, USA

<sup>3</sup>Department of Biochemistry, Developmental Genomics Group, Center of Excellence in Bioinformatics and Life Science, University at Buffalo, The State University of New York, Buffalo, NY, USA

<sup>4</sup>Department of Oral Biology, School of Dental Medicine, University at Buffalo, The State University of New York, Buffalo, NY, USA

### Corresponding Author:

O.J. Baker, School of Dentistry, The University of Utah, 383 Colorow Dr., Room 289A, Salt Lake City, UT 84108-1201, USA.  
Email: olga.baker@hsc.utah.edu

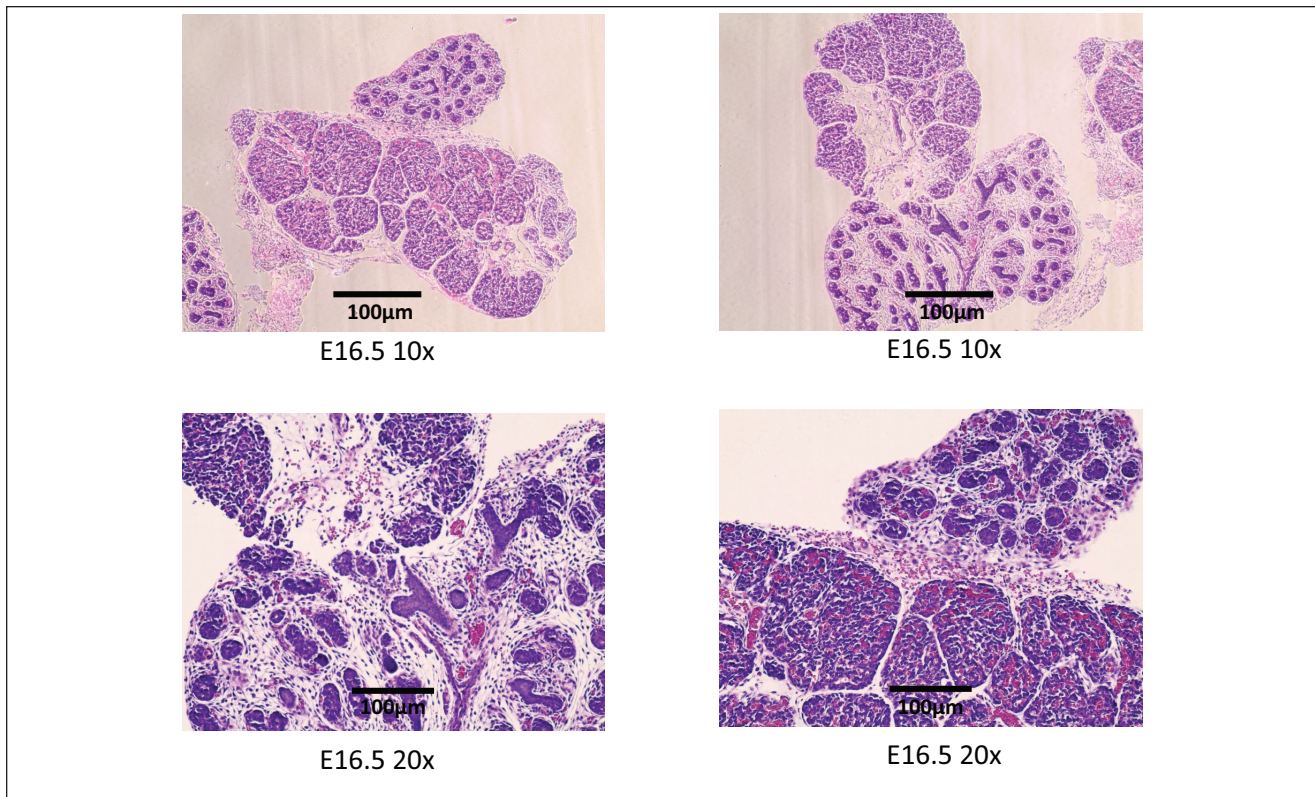

**Appendix Figure 2.** Hematoxylin and eosin staining of E16.5 mouse tissue sections. Formalin-fixed E16.5 and E18.5 SMGs were dissected out, embedded in paraffin, and stained with hematoxylin and eosin. No sublingual gland is evident in either the wild-type or *Nfib*<sup>-/-</sup> mice at age E16.5.

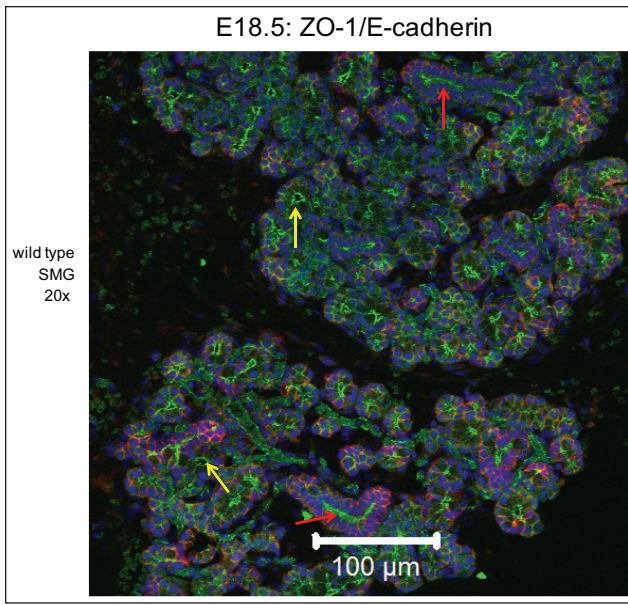

**Appendix Figure 3.** Ductal and terminal end bud lumen formation in E18.5 mouse tissue sections. Salivary glands were dissected, embedded in paraffin, and stained with ZO-1 (green) and E-cadherin (red) antibodies and propidium iodide (blue), as described in the Materials and Methods. Red arrows indicate ductal lumen formation and yellow arrows indicate terminal end bud lumen formation.

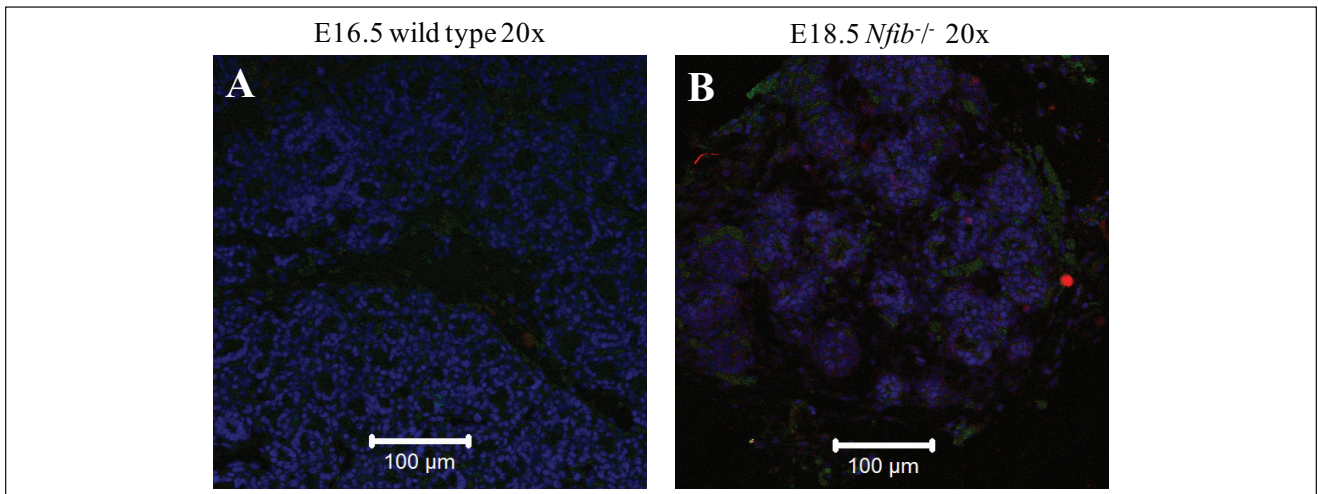

**Appendix Figure 4.** Negative control staining of E16.5 and E18.5 mouse tissue sections. Sections were incubated with Alexa Fluor 488-conjugated goat anti-rabbit (1:500 dilution in 5% goat serum; Sigma, St. Louis, MO, USA) and Alexa Fluor 633-conjugated goat anti-mouse (1:500 dilution in 5% goat serum; Sigma), as described in the Materials and Methods.
